# Supplementary material for: Long-term outcomes of epilepsy surgery in Sweden: A national prospective and longitudinal study
Source: PubMed Central journal article supplement — Neurology. 2013 Oct 1;81(14):1244–51. doi: 10.1212/WNL.0b013e3182a6ca7b (PMC3795607; doi:10.1212/wnl.0b013e3182a6ca7b), 2013-10-01
Supplement: supp_WNL.0b013e3182a6ca7b_Figure_e-1.pdf [file supp_WNL.0b013e3182a6ca7b_Figure_e-1.pdf]

# Supplemental figure. Flow-charts of patients and controls

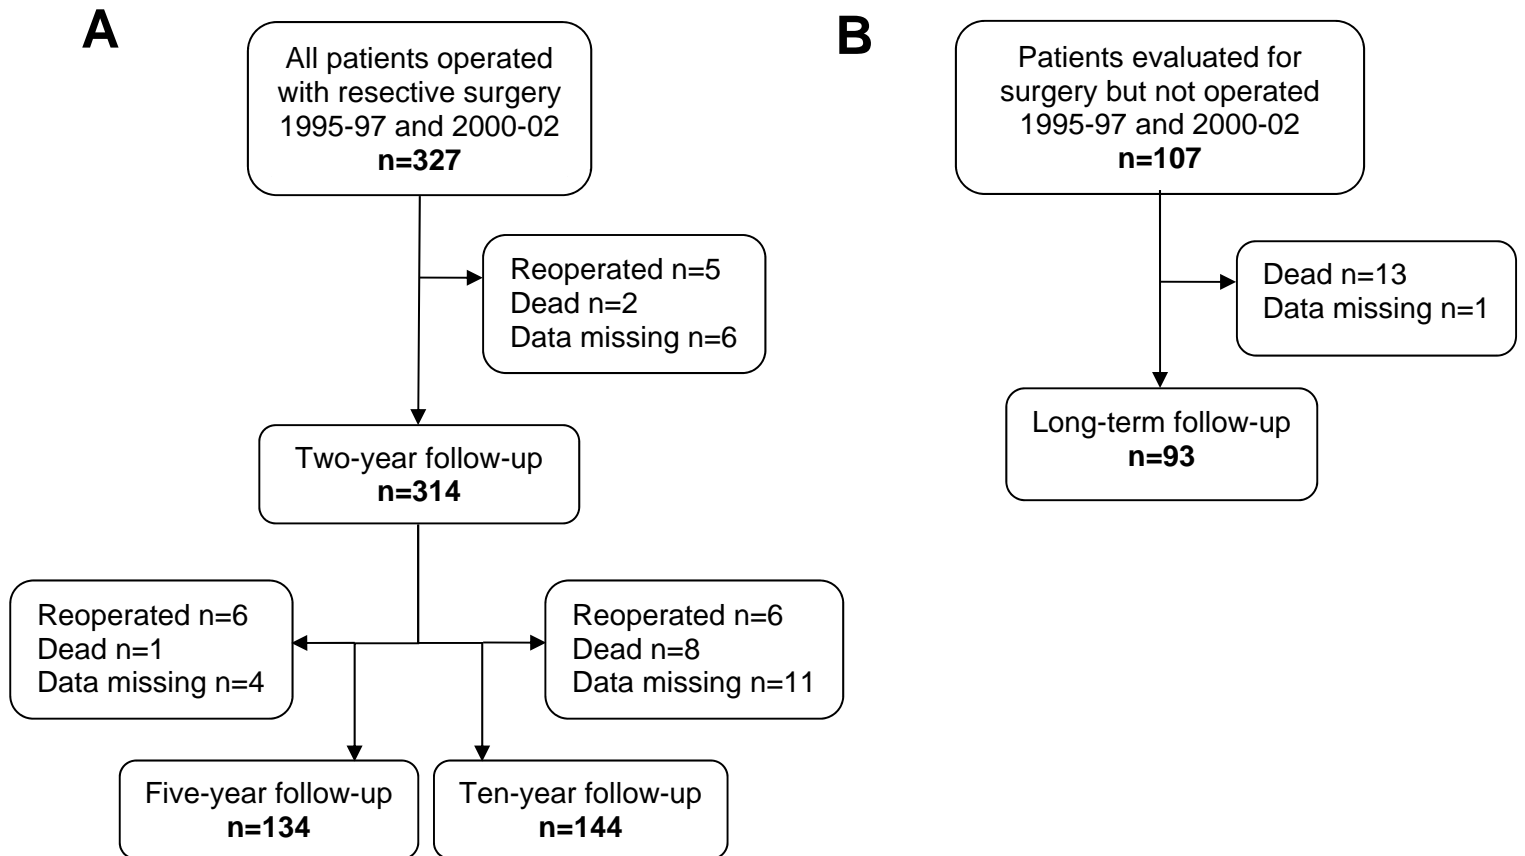

Flow-charts for follow-up of patients (A) and controls (B). Panel A: Patients not followed-up at two years: five children reoperated, two adults dead in SUDEP and one child and five adults lost to follow-up. Patients not followed-up at five years: one child and five adults reoperated, one child dead (non-epilepsy related), one child and three adults lost to follow-up. Patients not followed-up at ten years: one child and five adults reoperated, three children and three adults dead in SUDEP and one child and one adult in non-epilepsy related death, five children and six adults lost to follow-up. Panel B: All patients who are not followed-up are adults, four deaths are epilepsy-related, one patient was lost to follow-up.
