# Supplementary material for: Long-term outcomes of epilepsy surgery in Sweden: A national prospective and longitudinal study
Source: PubMed Central journal article supplement — Neurology. 2013 Oct 1;81(14):1244–51. doi: 10.1212/WNL.0b013e3182a6ca7b (PMC3795607; doi:10.1212/wnl.0b013e3182a6ca7b), 2013-10-01
Supplement: supp_WNL.0b013e3182a6ca7b_Table_e-1.pdf [file supp_WNL.0b013e3182a6ca7b_Table_e-1.pdf]

**Table e-1. Seizure outcome for adults and children at two, five and ten years after surgery.**

|                                            | Adults                            |                                 |                                 | Children                        |                                |                                 |
|--------------------------------------------|-----------------------------------|---------------------------------|---------------------------------|---------------------------------|--------------------------------|---------------------------------|
|                                            | 2 year seizure outcome<br>n= 187* | 5 year seizure outcome<br>n= 92 | 10 year seizure outcome<br>n=98 | 2 year seizure outcome<br>n=87* | 5 year seizure outcome<br>n=42 | 10 year seizure outcome<br>n=46 |
|                                            | n (%)                             | n (%)                           | n (%)                           | n (%)                           | n (%)                          | n (%)                           |
| <b>Sustained seizure freedom</b>           | 93 (50)                           | 36 (39)                         | 42 (43)                         | 46 (53)                         | 20 (48)                        | 19 (41)                         |
| <b>Seizure free last year of follow-up</b> | 17 (9)                            | 18 (20)                         | 21 (21)                         | 1 (1)                           | 3 (7)                          | 2 (4)                           |
| <b>&gt;75% seizure reduction</b>           | 25 (13)                           | 14 (15)                         | 13 (13)                         | 16 (18)                         | 12 (29)                        | 10 (22)                         |
| <b>50-75% seizure reduction</b>            | 23 (12)                           | 9 (10)                          | 10 (10)                         | 11 (13)                         | 1 (2)                          | 5 (11)                          |
| <b>0-50% seizure reduction</b>             | 26 (14)                           | 10 (11)                         | 8 (8)                           | 10 (12)                         | 3 (7)                          | 7 (15)                          |
| <b>Increased seizure frequency</b>         | 3 (2)                             | 5 (5)                           | 4 (4)                           | 3 (3)                           | 3 (7)                          | 3 (7)                           |

\* Two-year follow-up was missing for three adults and one child, none of whom was seizure free at that time according to later data.
